# Supplementary material for: The bZip Transcription Factor VdMRTF1 is a Negative Regulator of Melanin Biosynthesis and Virulence in Verticillium dahliae
Source: PubMed Central journal article supplement (PMC9045294; doi:10.1128/spectrum.02581-21), 2022-04-11
Supplement: spectrum.02581-21-s0001.pdf [file spectrum.02581-21-s0001.pdf]

## Supplementary data

### Figure S1. Phylogenetic analysis of VdMRTF1 of *Verticillium dahliae* and its homologs in other fungi.

Phylogenetic tree of *VdMRTF1* and its homologs in other fungi. All the amino acid sequences were aligned using the ClustalX program and the phylogenetic tree was viewed using a neighbor-joining method in MEGAX. The amino acid sequence of *VdMRTF1* and its homologs in following fungi were analyzed: *Verticillium dahliae* (VDAG\_09790), *Verticillium longisporum* (BN1708\_009494), *Colletotrichum truncatum* (CTRU02\_03318), *Colletotrichum simmondsii* (CSIM01\_00392), *Trichoderma gamsii* (TGAMA5MH\_10608), *Fusarium gramineum* (FGRMN\_6821) and *Fusarium avenaceum* (FAVG1\_12470). All proteins were downloaded from the NCBI database.

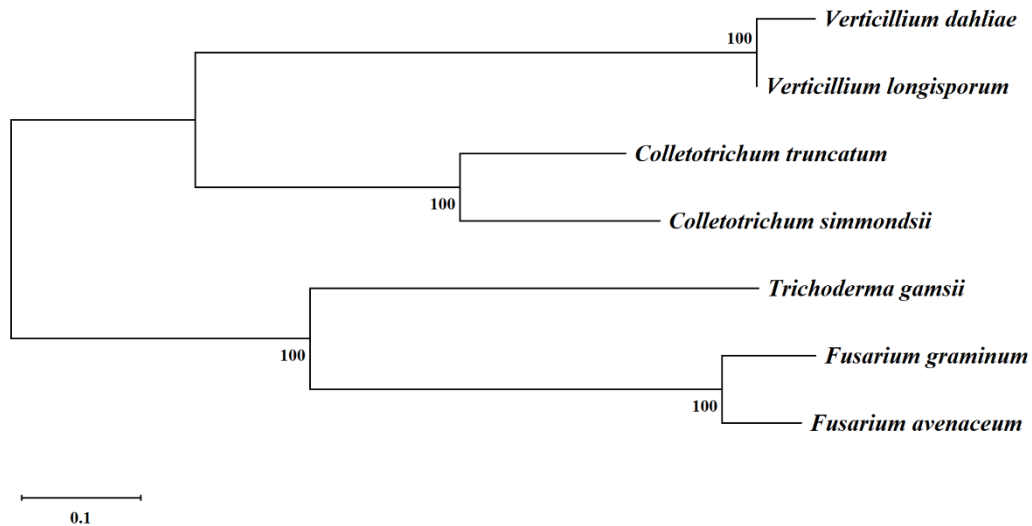

### Figure S2. Verification of $\Delta VdMRTF1$ mutant in *V. dahliae*.

(A-C) The *VdMRTF1* knock-out and complementated strain were screened and confirmed by PCR and RT-PCR analysis. All primers are shown in Table1. (D) Confirmation of  $\Delta VdMRTF1$  deletion mutants by Southern blotting. Genomic DNA of VdLs.17,  $\Delta VdMRTF1$  and  $\Delta VdMRTF1$ -C strains were digested with *KpnI*. There is no band in the VdLs.17 strain, but a 3164 bp band in  $\Delta VdMRTF1$  strain and  $\Delta VdMRTF1$ -C strain.

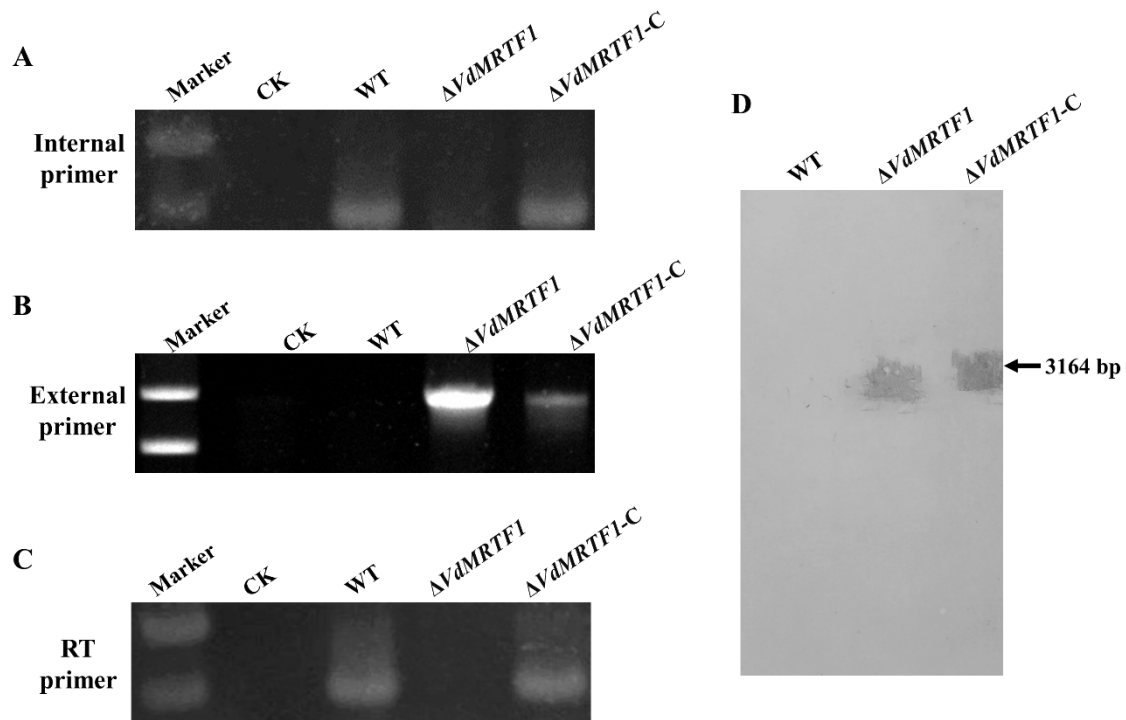

**Figure S3. The differentially expressed genes of the wild type VdLs.17 and  $\Delta VdMRTF1$  strains.**

Bar chart indicating the number of DEGs (differentially expressed genes) in the wild type and  $\Delta VdMRTF1$  strains.

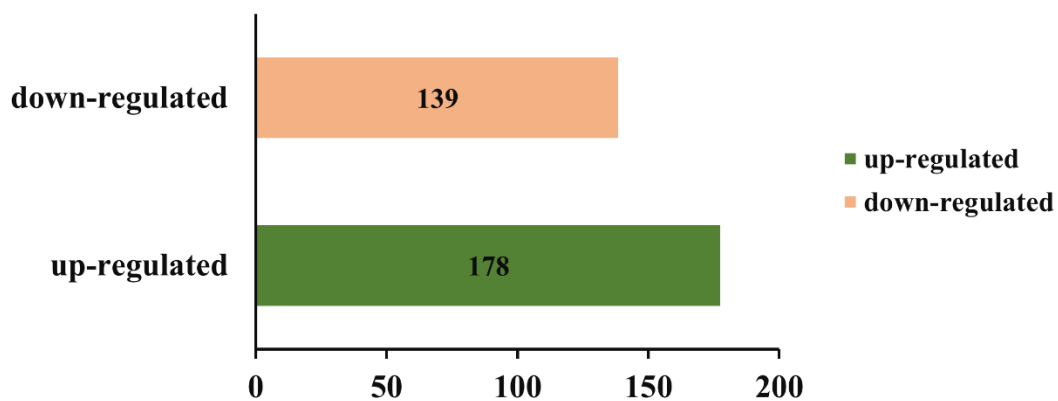

**Figure S4. The Gene Ontology (GO) classification of differentially expressed genes between the wild type and  $VdMRTF1$  mutant strains in *V. dahliae*.**

(A) Pie chart showing the GO classification of DEGs (differentially expressed genes) whose expression was increased after deletion of  $VdMRTF1$ . (B) The pie chart exhibiting GO classification of downregulated DEGs in  $\Delta VdMRTF1$  strain. GO classification of DEGs was conducted according

to the GO resource (<http://geneontology.org/>).

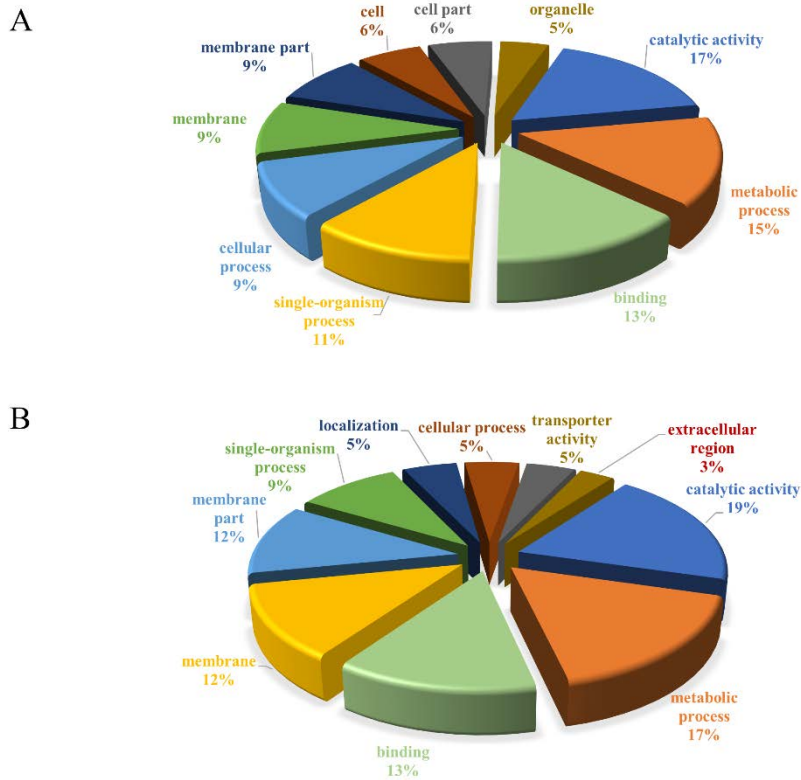

**Figure S5. The Kyoto Encyclopedia of Genes and Genomes (KEGG) classification and enrichment analyses of DEGs after loss of *VdMRTF1* in *V. dahliae*.**

(A) The histogram illustrates the KEGG classification of genes differentially expressed between the wild type *VdLs.17* and the  $\Delta VdMRTF1$  strains. (B) A bubble chart indicates DEGs enriched in 20 KEGG pathways. The bubble size represents the number of DEGs. The X-axis represents the enrichment factor and the Y-axis represents KEGG pathway term.

A

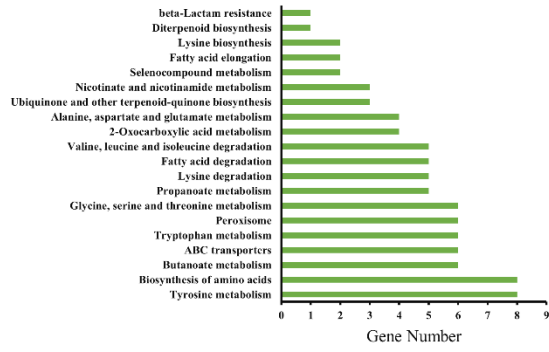

B

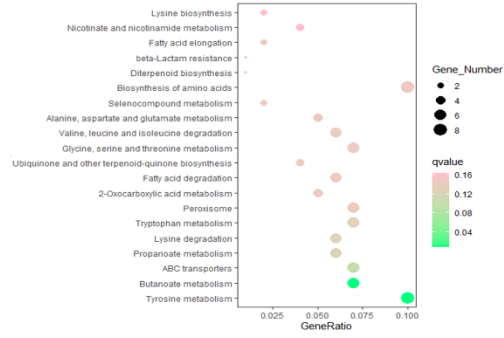

**Table S1. List of primers used in this study.**

| Primer name              | Description                            | Primer sequence (5'-3')                        |
|--------------------------|----------------------------------------|------------------------------------------------|
| bZIP25 5Fs<br>bZIP25 5Fx | 5' flanking sequence of VdMRTF1        | TCCGTCACCAACCAGATA<br>GTTCTCCGACACTCTCCT       |
| bZIP25 3Fs<br>bZIP25 3Fx | 3' flanking sequence of VdMRTF1        | ACAGCAATCATGTGCATGG<br>GTCCCGCCTTATTCTGGT      |
| bZIP25 ns<br>bZIP25 nx   | Internal screening primer of VdMRTF1   | CCAGCAATGAACAGACCTCG<br>TTGTAAAGCGGCGTACCTTG   |
| bZIP25 zhs<br>bZIP25 zhx | External screening primer of VdMRTF1   | CATGCATCAGACTTCCCAGC<br>CTCCATAAAGCCAACCACG    |
| bZIP25 hbs<br>bZIP25 hbx | Primers for complementation of VdMRTF1 | CCCGGACGTGACTACTTTTC<br>CCTTGTCCATGCACATGATT   |
| P123<br>P124             | Southern blot probe of VdMRTF1         | CACCGCGACGTCTGTCGAGAAG<br>GGACGATTGCGTCGCATCGA |
| HYF<br>HYR               | hygromycin- resistance cassette        | CGTTGCAAGACCTGCCTGAA<br>GGATGCCTCCGCTCGAAGTA   |

**Supplementary Table 2 Gene ontology annotation of the top 10 up-regulated and the top 10 down-regulated DEGs.**

| #ID          | Regulated | GO_annotation                                                                                                                                                                                                                                                                              |
|--------------|-----------|--------------------------------------------------------------------------------------------------------------------------------------------------------------------------------------------------------------------------------------------------------------------------------------------|
| VDAG_07999   | up        | Molecular Function: kinase activity (GO:0016301)                                                                                                                                                                                                                                           |
| VDAG_10373   | up        | --                                                                                                                                                                                                                                                                                         |
| VDAG_10085   | up        | Molecular Function: manganese ion transmembrane transporter activity (GO:0005384); Cellular Component: integral component of membrane (GO:0016021); Biological Process: cellular manganese ion homeostasis (GO:0030026)                                                                    |
| VDAG_00321   | up        | --                                                                                                                                                                                                                                                                                         |
| VDAG_00047   | up        | Molecular Function: ATP binding (GO:0005524); Molecular Function: methyltransferase activity (GO:0008168)                                                                                                                                                                                  |
| VDAG_03345   | up        | Molecular Function: oxidoreductase activity, acting on the aldehyde or oxo group of donors, NAD or NADP as acceptor (GO:0016620)                                                                                                                                                           |
| NewGene_1021 | up        | --                                                                                                                                                                                                                                                                                         |
| VDAG_01167   | up        | Molecular Function: ATP binding (GO:0005524); Cellular Component: integral component of membrane (GO:0016021); Molecular Function: ATPase activity (GO:0016887); Molecular Function: ATPase activity, coupled to transmembrane movement of substances (GO:0042626)                         |
| VDAG_09115   | up        | Molecular Function: catalase activity (GO:0004096); Biological Process: response to oxidative stress (GO:0006979); Molecular Function: heme binding (GO:0020037); Biological Process: hydrogen peroxide catabolic process (GO:0042744); Molecular Function: metal ion binding (GO:0046872) |
| VDAG_00931   | up        | Biological Process: carbohydrate metabolic process (GO:0005975); Molecular Function: cellulase activity (GO:0008810)                                                                                                                                                                       |
| VDAG_10412   | down      | --                                                                                                                                                                                                                                                                                         |
| VDAG_06734   | down      | Biological Process: carbohydrate metabolic process (GO:0005975); Molecular Function: chitin binding (GO:0008061)                                                                                                                                                                           |
| VDAG_01547   | down      | --                                                                                                                                                                                                                                                                                         |
| VDAG_07711   | down      | Molecular Function: catalytic activity (GO:0003824); Cellular Component: integral component of membrane (GO:0016021)                                                                                                                                                                       |
| VDAG_02280   | down      | --                                                                                                                                                                                                                                                                                         |
| VDAG_02655   | down      | --                                                                                                                                                                                                                                                                                         |
| VDAG_08070   | down      | --                                                                                                                                                                                                                                                                                         |
| VDAG_10100   | down      | Cellular Component: integral component of peroxisomal membrane (GO:0005779); Biological Process: peroxisome fission (GO:0016559)                                                                                                                                                           |
| VDAG_08214   | down      | Molecular Function: oxidoreductase activity (GO:0016491)                                                                                                                                                                                                                                   |
| VDAG_02240   | down      | --                                                                                                                                                                                                                                                                                         |
